# Supplementary material for: Antimicrobial and antioxidant supramolecular ionic liquid gels from biopolymer mixtures
Source: Royal Society of Chemistry journal article supplement (doi:10.1039/d2gc04358k), 2023-01-01
Supplement: d2gc04358k1.pdf [file d2gc04358k1.pdf]

**Electronic Supplementary Information**

**Antimicrobial and Antioxidant Supramolecular Ionic Liquid  
Gels from Biopolymer Mixtures**

*Salvatore Marullo,<sup>a</sup> Giuseppe Gallo,<sup>b</sup> Giulia Infurna,<sup>c</sup> Nadka Tz. Dintcheva<sup>c</sup> and  
Francesca D'Anna<sup>a\*</sup>*

*a) Università degli Studi di Palermo, Dipartimento di Scienze Biologiche, Chimiche e  
Farmaceutiche, Sezione di Chimica, Viale delle Scienze, Ed. 17, 90128 Palermo, Italia*

*b) Università degli Studi di Palermo, Dipartimento di Scienze Biologiche, Chimiche e  
Farmaceutiche, Sezione di Biologia Cellulare, Viale delle Scienze, Ed. 16, 90128 Palermo, Italia*

*c) Università degli Studi di Palermo, Dipartimento di Ingegneria, Viale delle Scienze, Ed. 6, 90128  
Palermo, Italia*

\*Corresponding author: Prof. F. D'Anna. E-mail: [francesca.danna@unipa.it](mailto:francesca.danna@unipa.it)

## Table of contents

|                                                                                                             |          |
|-------------------------------------------------------------------------------------------------------------|----------|
| <b>Table S1.</b> Protocols for the formation of biopolymer-based ionic liquid gels.                         | <b>3</b> |
| <b>Figure S1.</b> <sup>1</sup> H NMR and <sup>13</sup> C NMR spectra of [bmpyrr][OAc] and [Ch][Gly]         | <b>3</b> |
| <b>Figure S2.</b> Representative FTIR-ATR spectra of polymers, ILs and gel.                                 | <b>3</b> |
| <b>Figure S3.</b> <sup>1</sup> H NMR spectra of [bmpyrr][OAc] in the absence and in the presence of lignin. | <b>3</b> |
| <b>Figure S4.</b> Plots of strain and frequency sweeps measurements for biopolymer-based ionic liquid gels. | <b>4</b> |
| <b>Figure S5.</b> Structure of octadecyl-3-(3,5-di-tert-butyl-4-hydroxyphenyl)-propionate.                  | <b>5</b> |
| <b>Figure S6.</b> Pictures of supernatant solution treated with culture medium.                             | <b>5</b> |
| <b>Figure S7.</b> <sup>1</sup> H NMR spectra relevant to gels in contact with D <sub>2</sub> O.             | <b>5</b> |

**Table S1.** Protocols for the formation of biopolymer-based ionic liquid gels.

| <b>Heating at 100 °C for 1h, under stirring.<br/>Cooled at room temperature.</b> | <b>Sonication 5 min, followed by heating at 100 °C for 1h. Cooled ad room temperature.</b> |
|----------------------------------------------------------------------------------|--------------------------------------------------------------------------------------------|
| CS:CT/[bmim][OAc]                                                                | CS:LG/[bmim][OAc]                                                                          |
| CS:CT/[bmpyrr][OAc]                                                              | CS:LG/[bmpyrr][OAc]                                                                        |
| CS:CT/[bmim][Cl]                                                                 | CS:LG/[bmim][Cl]                                                                           |
| CT:CE/[bmim][Cl]                                                                 | CS:CE/[bmpyrr][Cl]                                                                         |

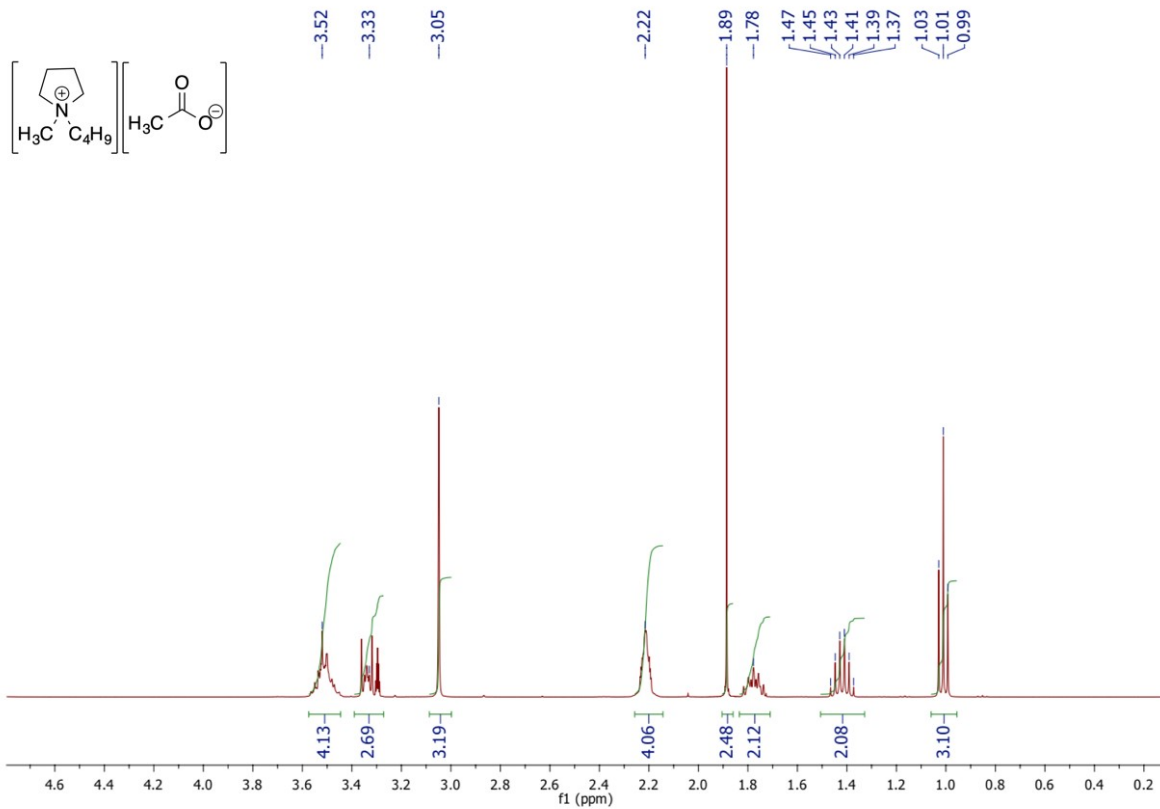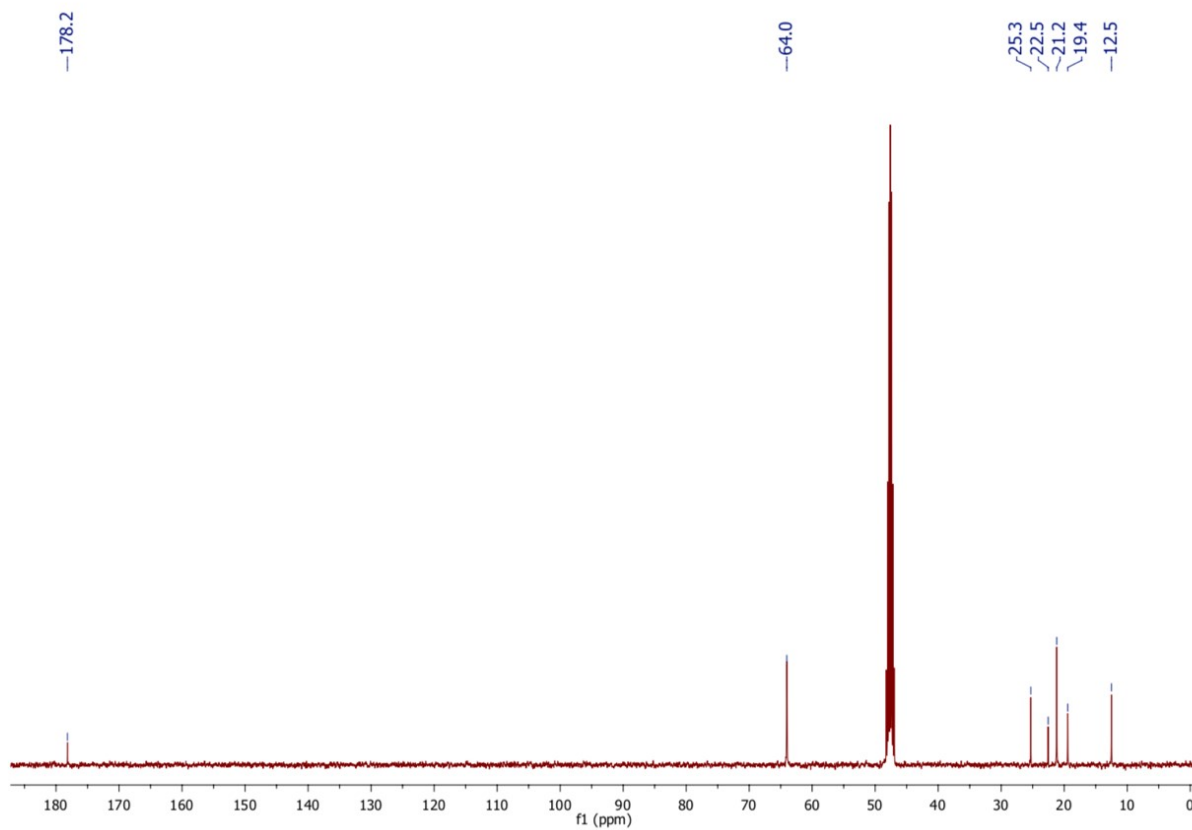

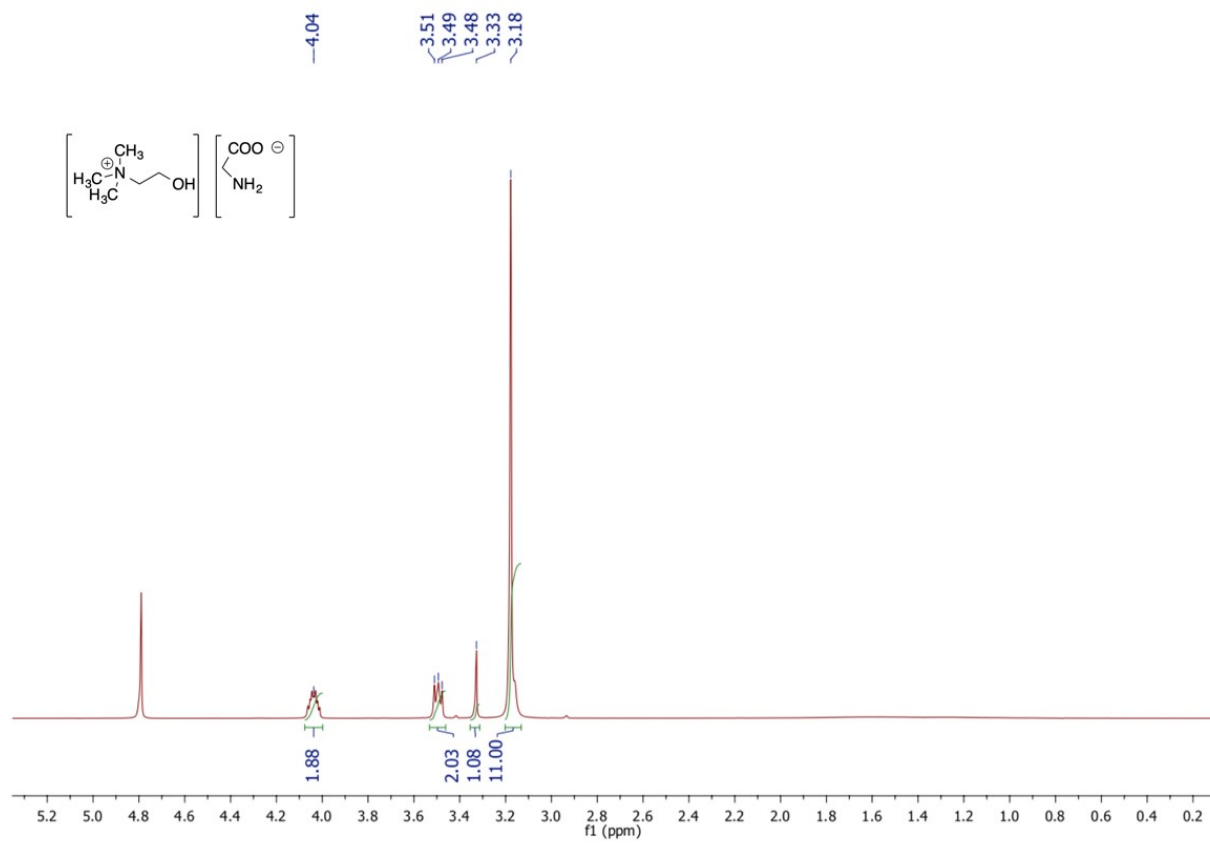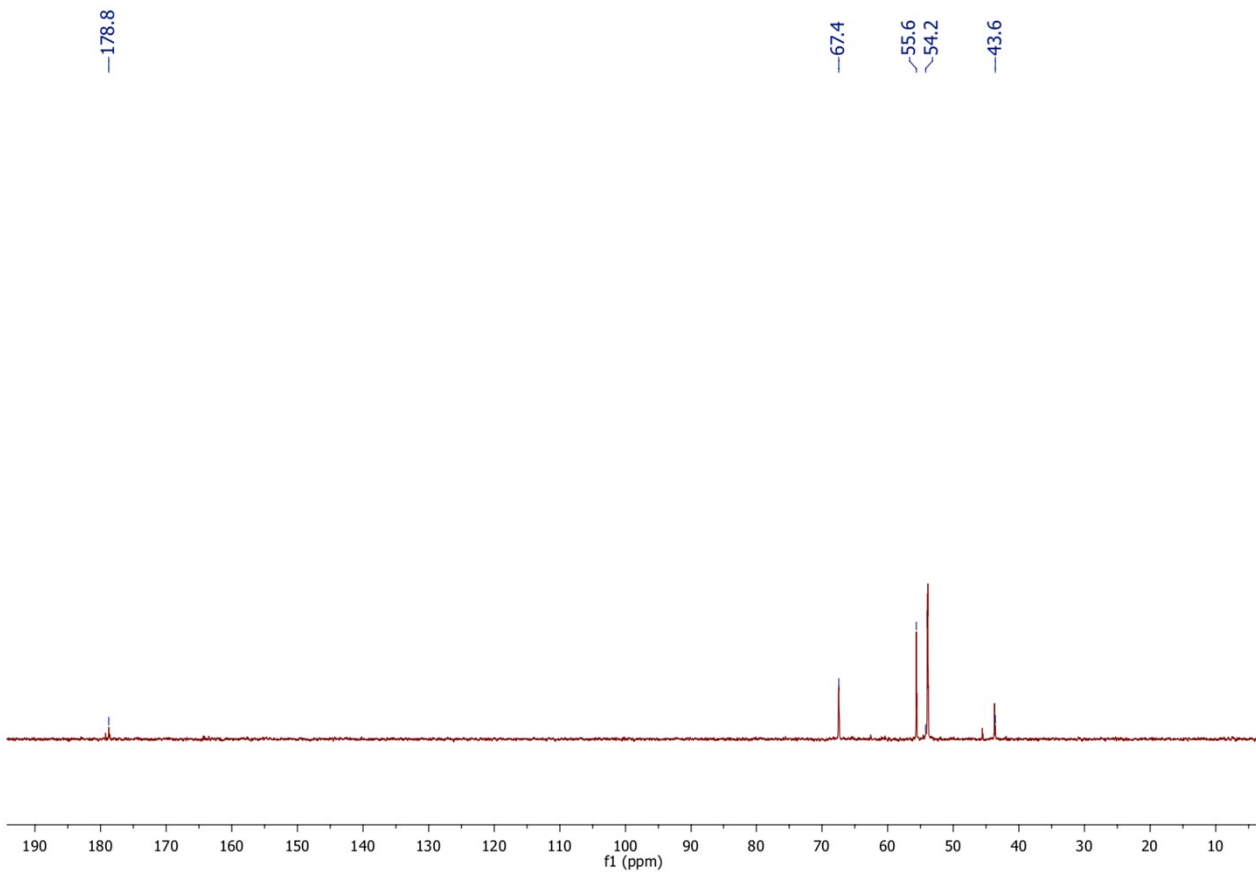

**Figure S1.**  $^1\text{H}$  NMR and  $^{13}\text{C}$  NMR spectra of [bmpyr][OAc] and [Ch][Gly].

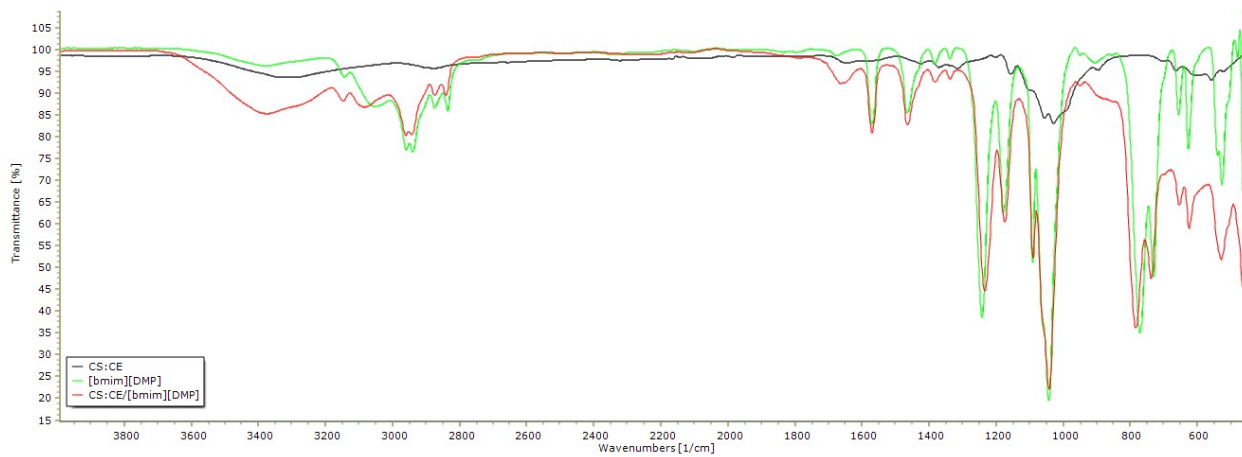

**Figure S2.** FTIR-ATR spectra of polymers, ILs and gels. Spectra were plotted with Spectragryph.<sup>1</sup>

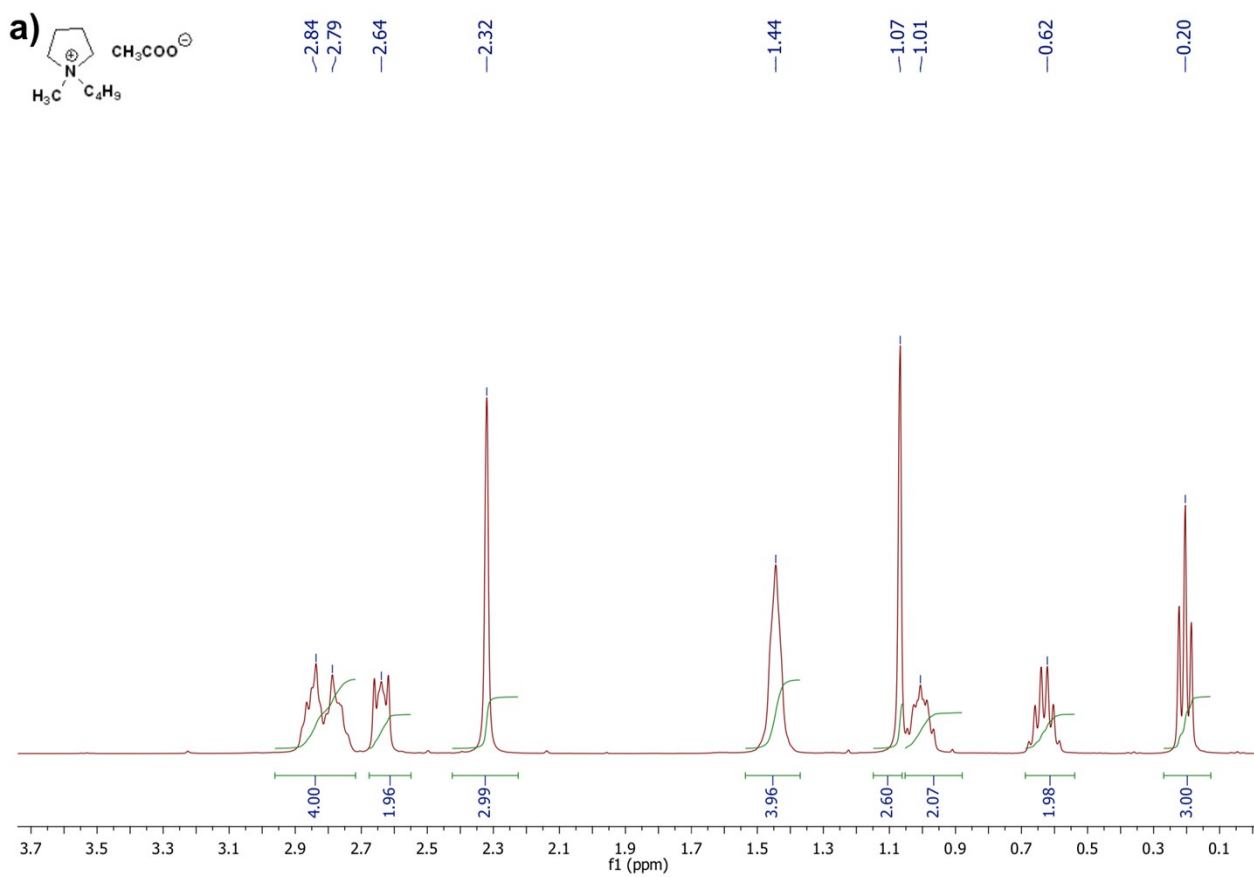

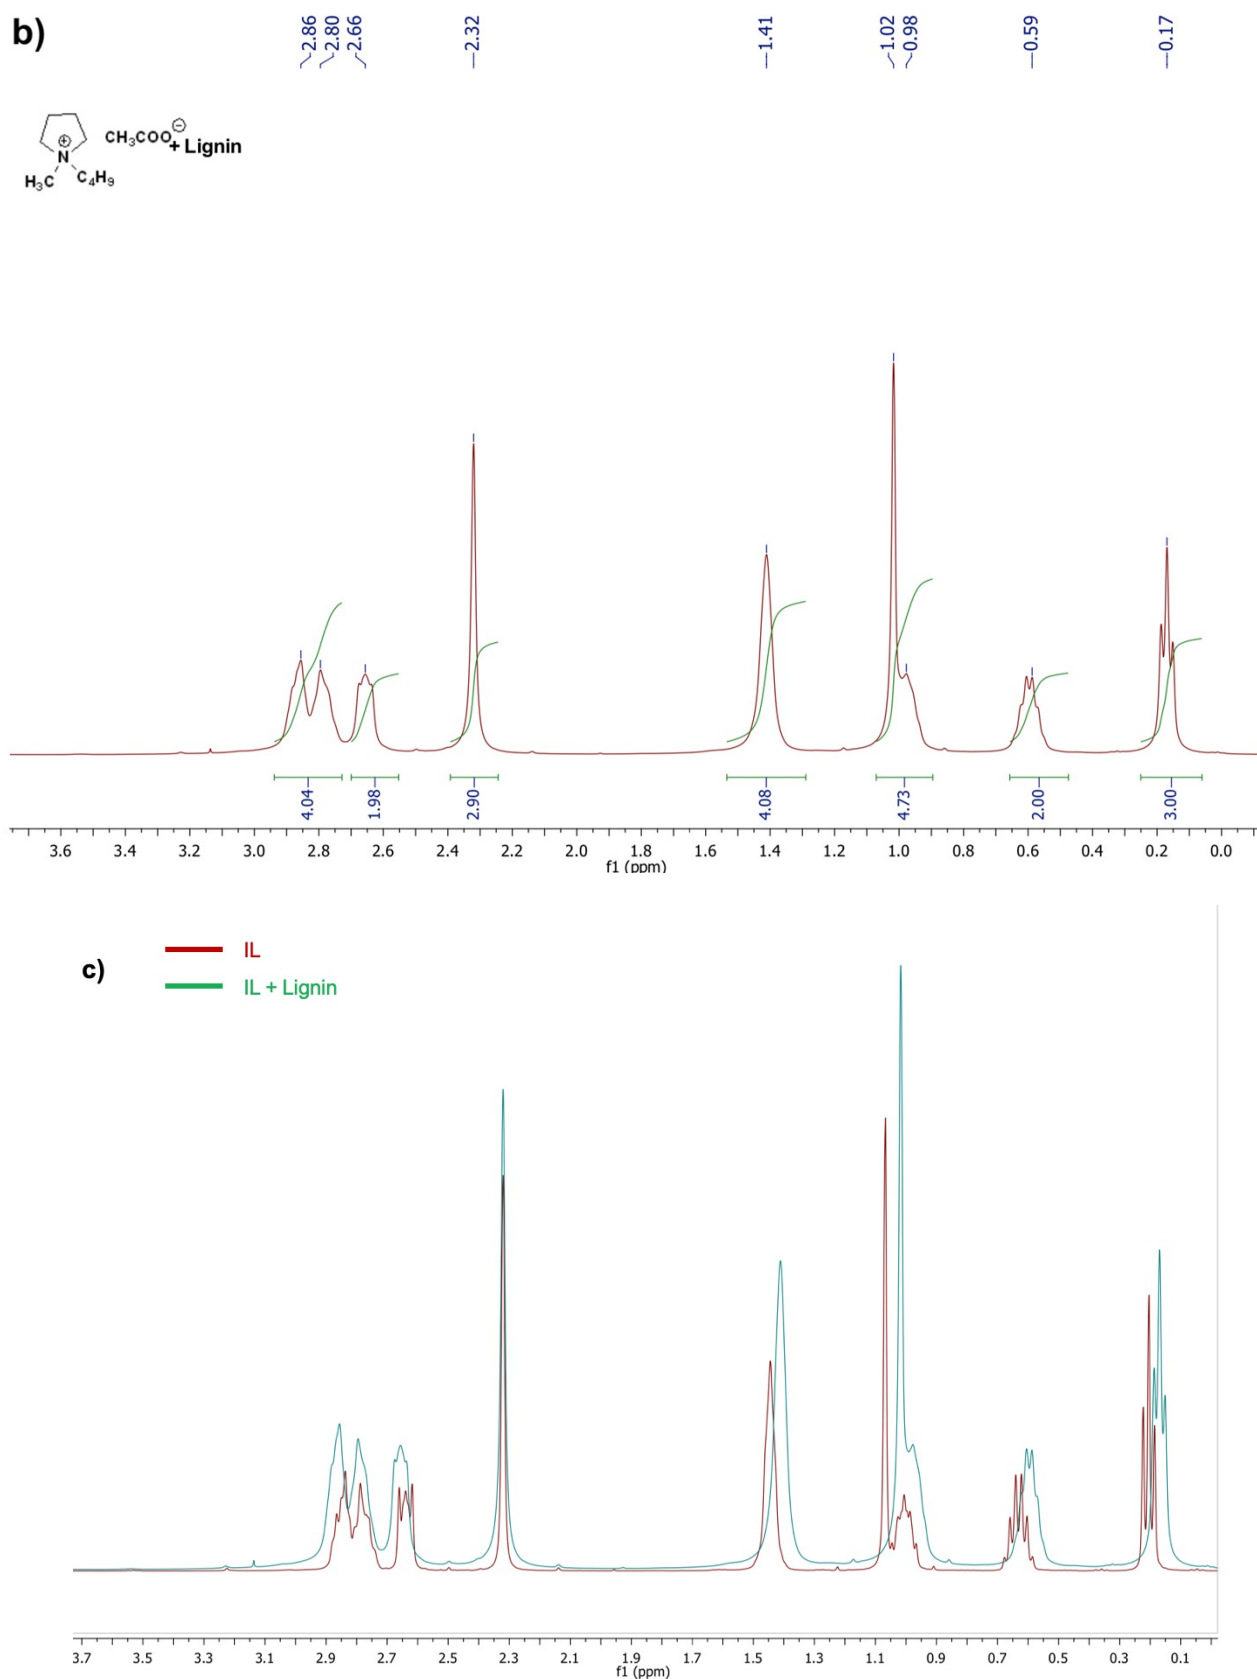

**Figure S3.**  $^1\text{H}$  NMR spectra of a) [bmpyr][OAc], b) [bmpyr][OAc] in the presence of lignin and c) superimposed spectra.

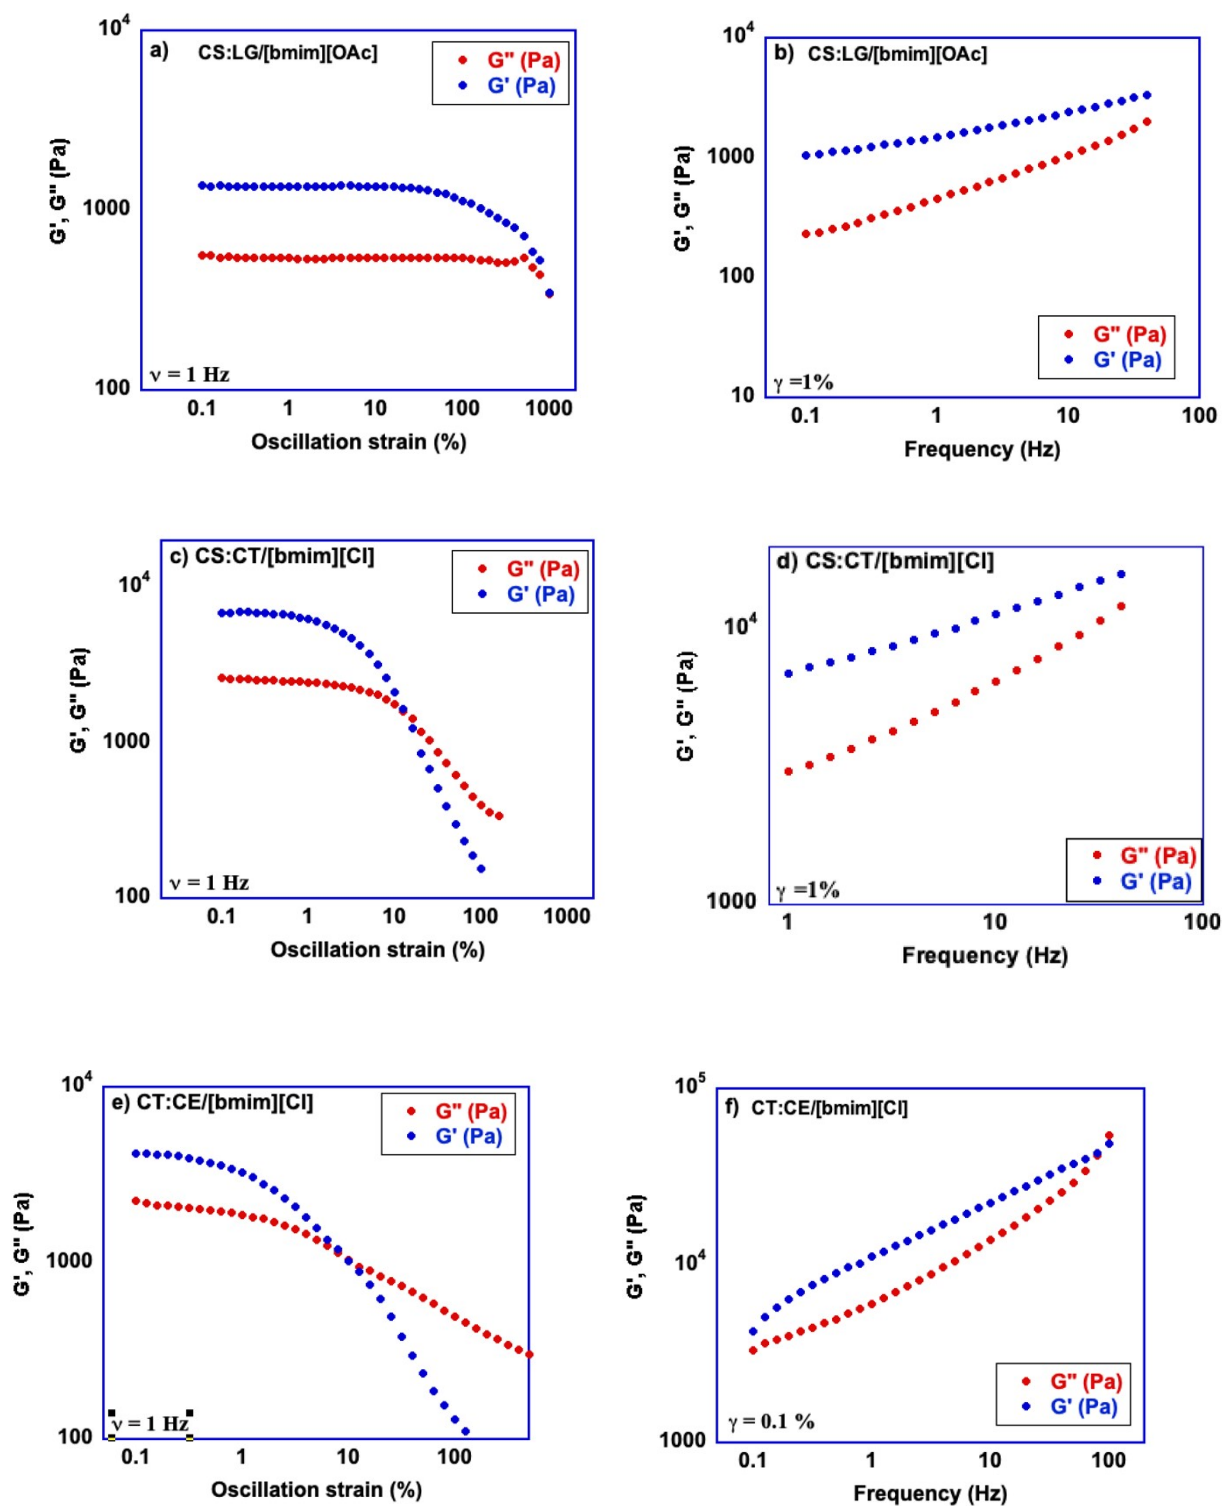

**Figure S4.** Plots of strain and frequency sweeps measurements for biopolymer-based ionic liquid gels.



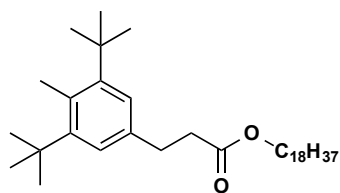

**Figure S5.** Structure of octadecyl-3-(3,5-di-tert-butyl-4-hydroxyphenyl)-propionate.

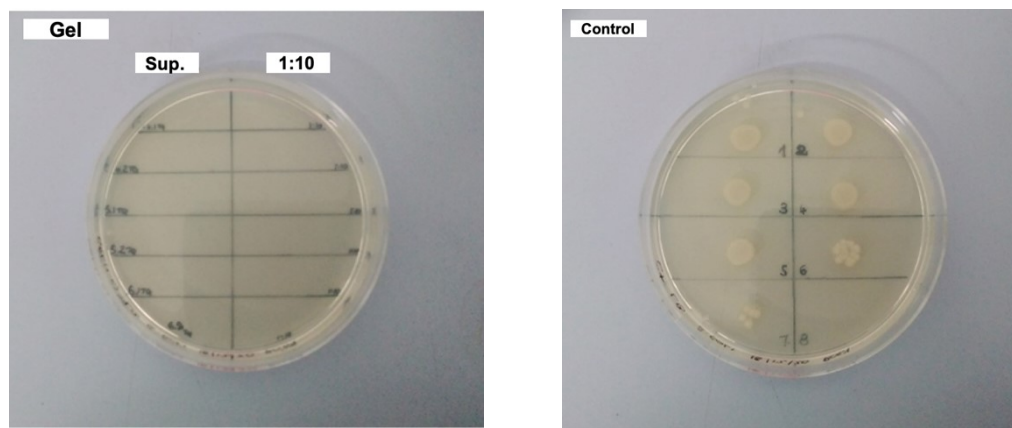

**Figure S6.** Pictures of supernatant solution treated with culture medium (left) and control sample (right).

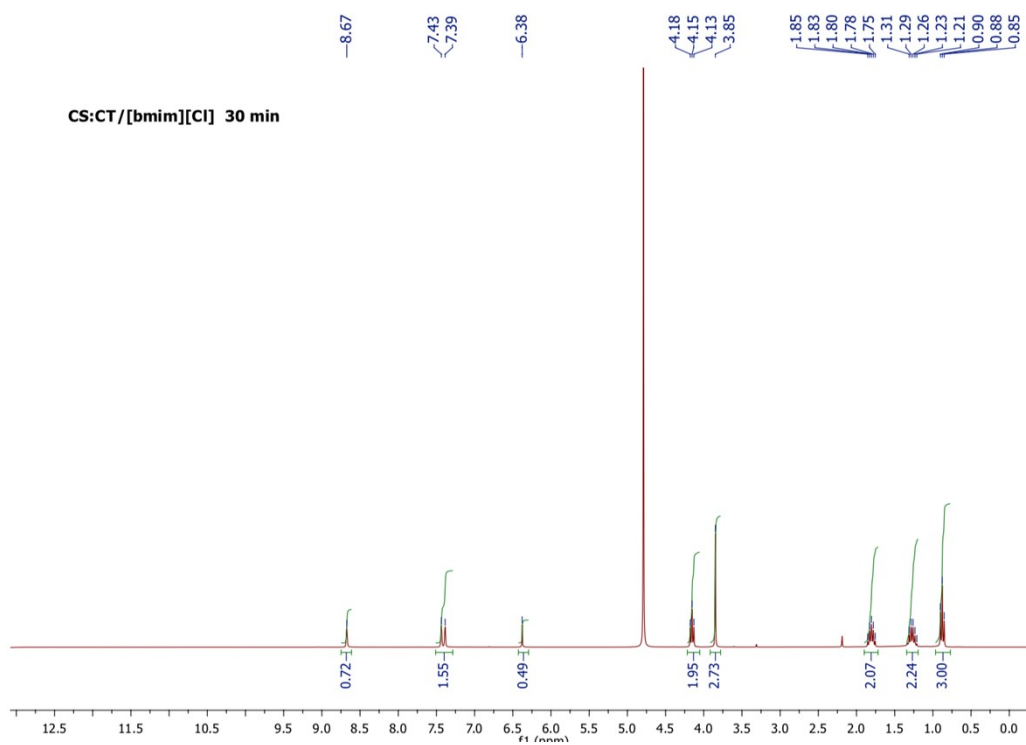

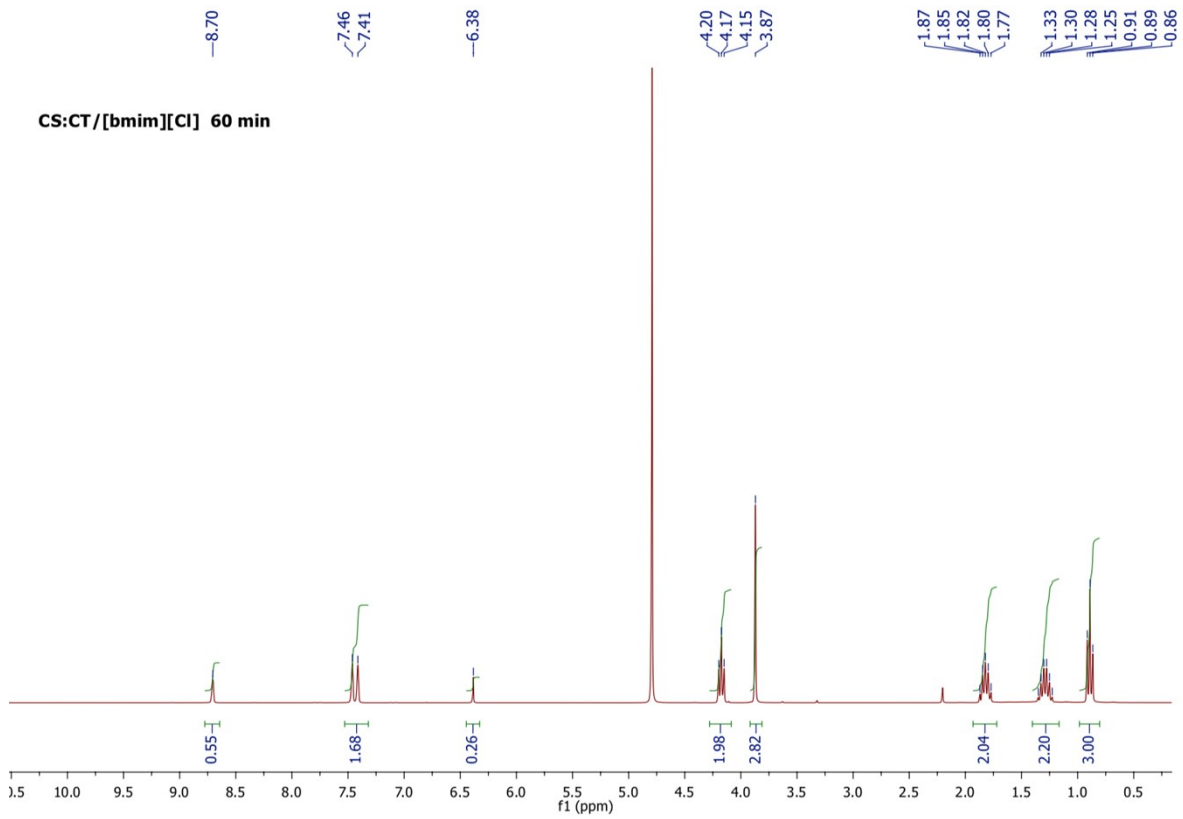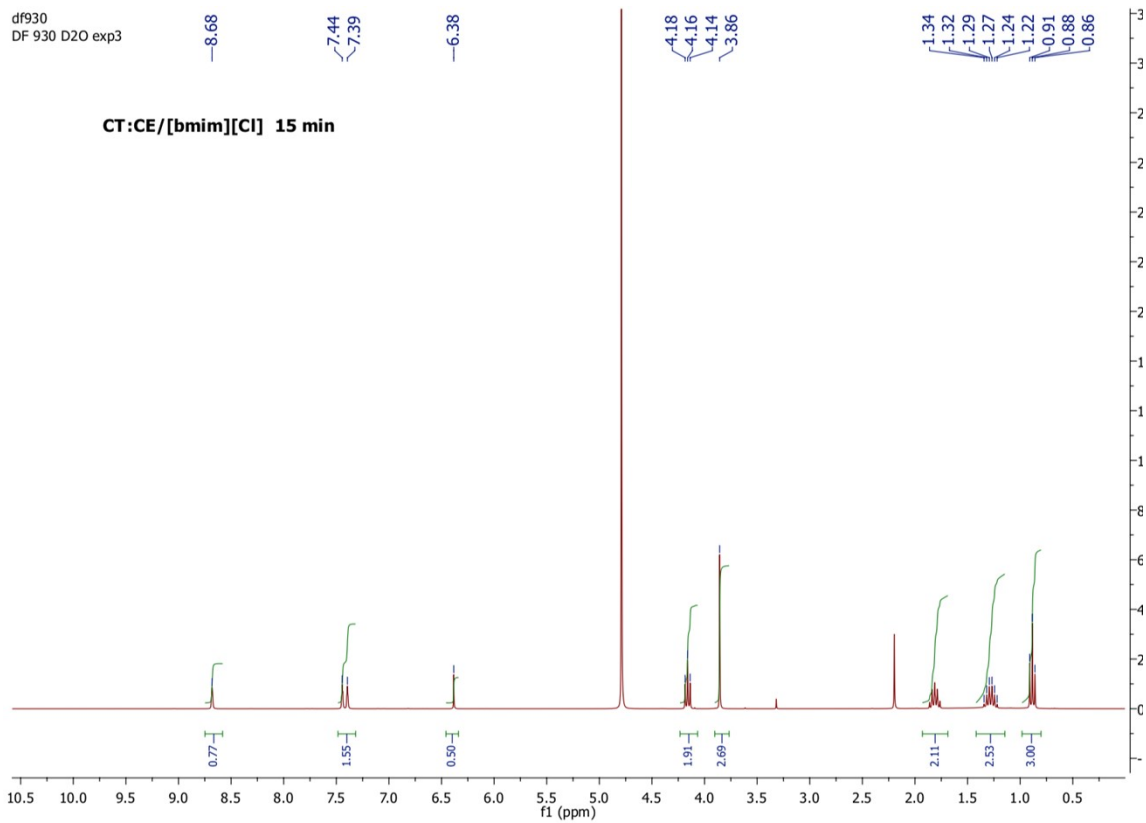

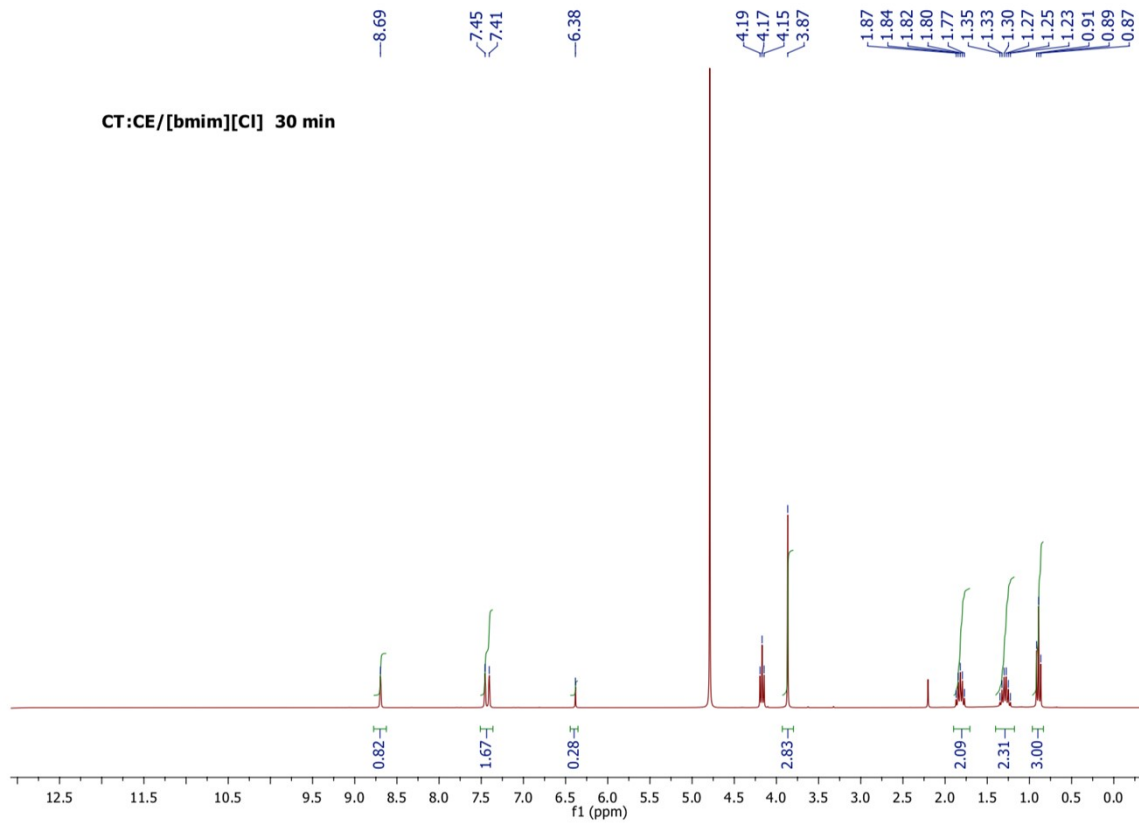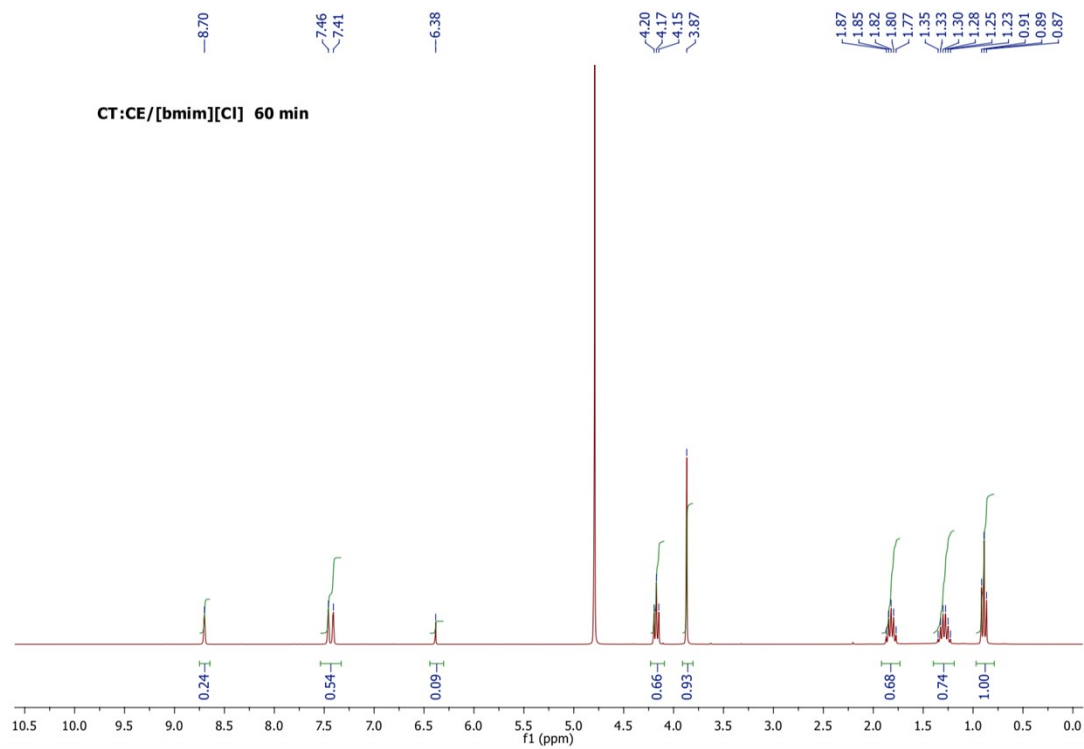

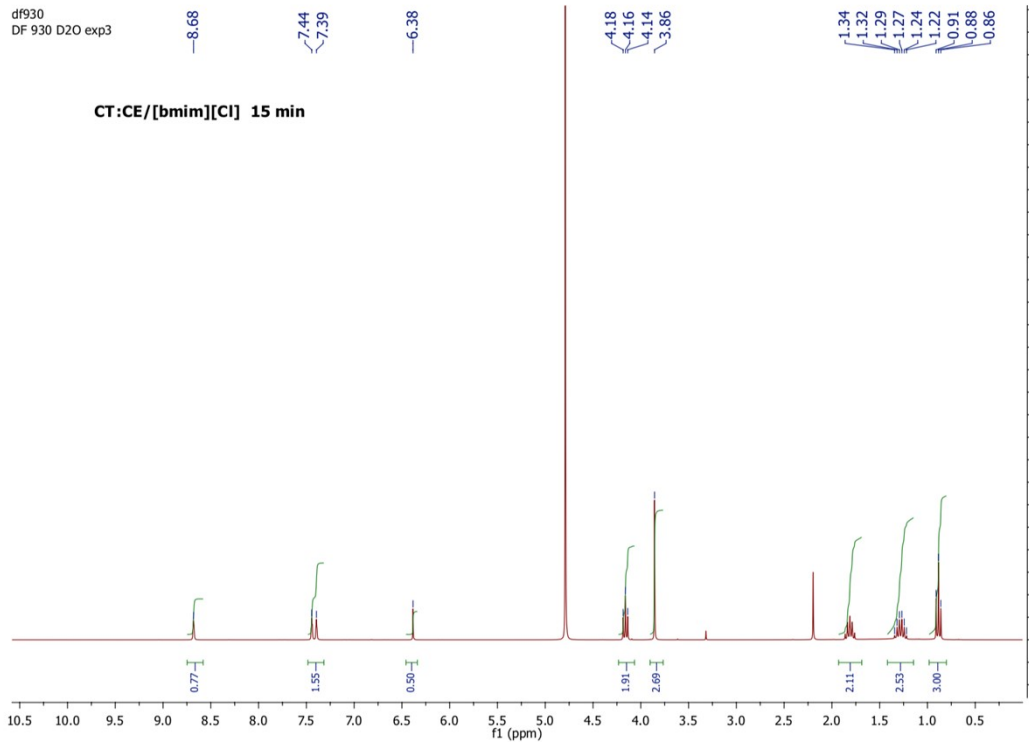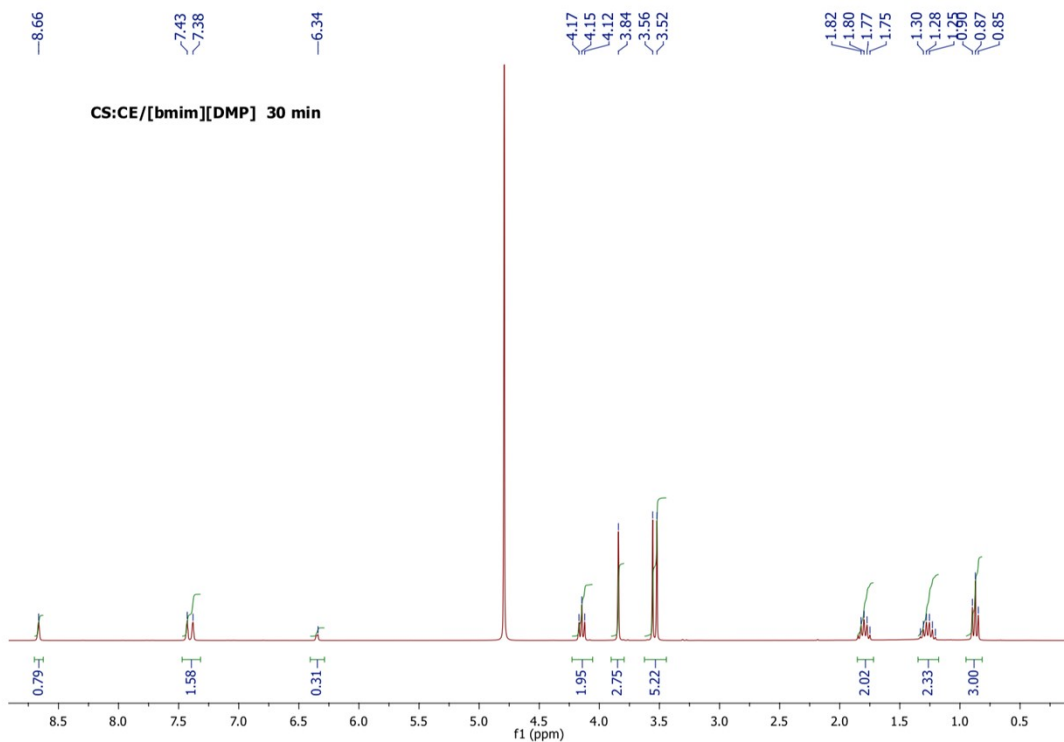

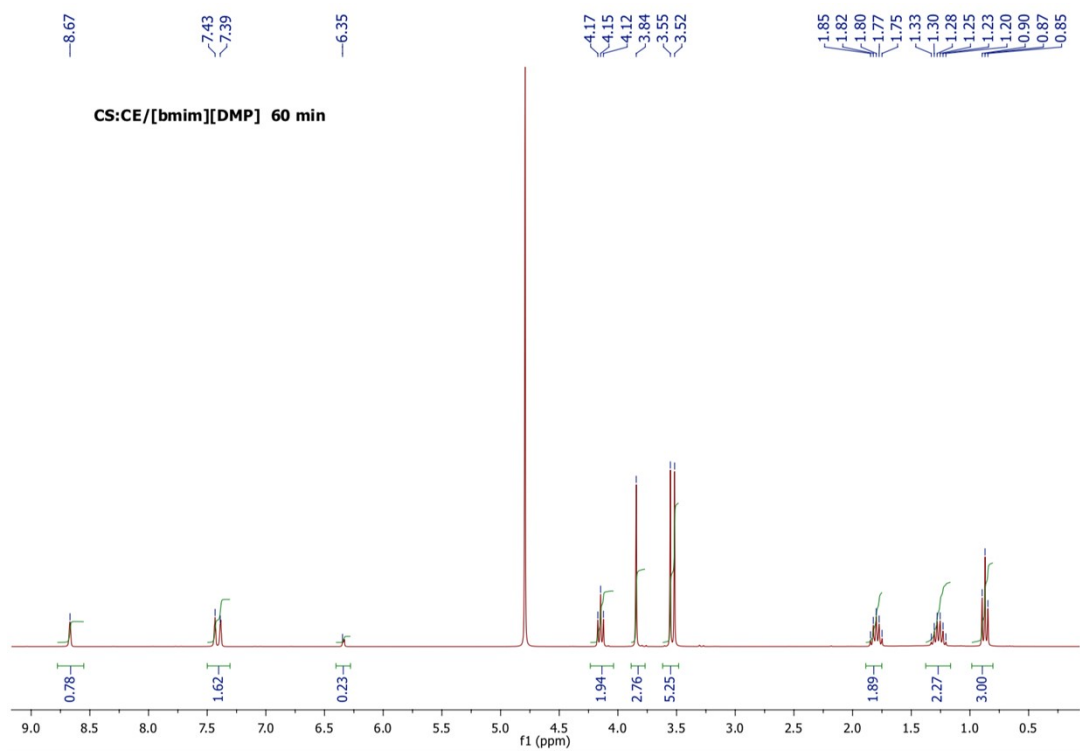

**Figure S7.**  $^1\text{H}$  NMR spectra obtained upon contact of ionic liquid gels at variable times with  $\text{D}_2\text{O}$ .

1 F. Menges, *Spectragryph- optical spectroscopy software -Version 1.2.15*
